# Supplementary material for: Physical Activity and Incident Cardiovascular Disease in Women: Is the Relation Modified by Level of Global Cardiovascular Risk?
Source: PubMed Central journal article supplement — J Am Heart Assoc. 2018 Jun 12;7(12):e008234. doi: 10.1161/JAHA.117.008234 (PMC6220541; doi:10.1161/jaha.117.008234), 2018-06-12
Supplement: JAH3-7-e008234-s001.pdf [file JAH3-7-e008234-s001.pdf]

# **SUPPLEMENTAL MATERIAL**

**Table S1. Hazard ratios (95% CI) of coronary heart disease (CHD), stroke, and total cardiovascular disease (CVD) according to categories of the Reynolds Risk Score.**

|                            | No. of Person-Years<br>(No. of Events) | Age- and Treatment-adjusted HR<br>(95% CI) | Multivariable-adjusted* HR<br>(95% CI) |
|----------------------------|----------------------------------------|--------------------------------------------|----------------------------------------|
| <b>CHD</b>                 |                                        |                                            |                                        |
| <b>Reynolds Risk Score</b> |                                        |                                            |                                        |
| < 5%                       | 416,715 (220)                          | 1.00                                       | 1.00                                   |
| 5 - < 10%                  | 44,334 (116)                           | 4.55 (3.51, 5.90)                          | 3.59 (2.74, 4.69)                      |
| 10 - < 20%                 | 15,750 (85)                            | 9.06 (6.68, 12.28)                         | 6.66 (4.83, 9.19)                      |
| ≥ 20%                      | 4190 (37)                              | 14.88 (10.08, 21.96)                       | 9.91 (6.52, 15.08)                     |
| <i>P</i> for trend         |                                        | <.0001                                     | <.0001                                 |
| <b>STROKE</b>              |                                        |                                            |                                        |
| <b>Reynolds Risk Score</b> |                                        |                                            |                                        |
| < 5%                       | 416,179 (388)                          | 1.00                                       | 1.00                                   |
| 5 - < 10%                  | 44,458 (130)                           | 1.67 (1.33, 2.09)                          | 1.51 (1.20, 1.90)                      |
| 10 - < 20%                 | 15,918 (96)                            | 2.82 (2.16, 3.68)                          | 2.48 (1.88, 3.28)                      |
| ≥ 20%                      | 4223 (36)                              | 4.07 (2.80, 5.90)                          | 3.22 (2.17, 4.80)                      |
| <i>P</i> for trend         |                                        | <.0001                                     | <.0001                                 |
| <b>TOTAL CVD</b>           |                                        |                                            |                                        |
| <b>Reynolds Risk Score</b> |                                        |                                            |                                        |
| < 5%                       | 420,218 (1032)                         | 1.00                                       | 1.00                                   |
| 5 - < 10%                  | 43,919 (422)                           | 2.93 (2.57, 3.34)                          | 2.56 (2.24, 2.94)                      |
| 10 - < 20%                 | 15,184 (276)                           | 5.07 (4.32, 5.95)                          | 4.33 (3.66, 5.12)                      |
| ≥ 20%                      | 3884 (130)                             | 9.56 (7.79, 11.71)                         | 7.66 (6.16, 9.53)                      |
| <i>P</i> for trend         |                                        | <.0001                                     | <.0001                                 |

\*Adjusted for age; randomized treatment assignment; smoking status; consumption of alcohol, saturated fat, fiber, fruits, and vegetables; menopausal status; postmenopausal hormone use; physical activity.

**Table S2. Hazard ratios (95% CI) of coronary heart disease (CHD), stroke, and total cardiovascular (CVD) for being Physically Active ( $\geq 500$  kcal/wk) within categories of the Reynolds Risk Score**

|                          | # events | Age- and treatment-adjusted HR (95% CI) | Multivariable HR (95% CI)* |
|--------------------------|----------|-----------------------------------------|----------------------------|
| <b>CHD</b>               |          |                                         |                            |
| All women                | 458      | 0.57 (0.47, 0.68)                       | 0.64 (0.53, 0.77)          |
| Reynolds Risk Score      |          |                                         |                            |
| < 5%                     | 220      | 0.73 (0.56, 0.95)                       | 0.78 (0.59, 1.02)          |
| 5 - < 10%                | 116      | 0.73 (0.51, 1.06)                       | 0.71 (0.49, 1.04)          |
| 10 - < 20%               | 85       | 0.42 (0.26, 0.68)                       | 0.43 (0.26, 0.70)          |
| $\geq 20\%$              | 37       | 0.67 (0.34, 1.34)                       | 1.04 (0.50, 2.17)          |
| <i>P</i> for interaction |          | 0.16                                    | 0.20                       |
| <b>STROKE</b>            |          |                                         |                            |
| All women                | 650      | 0.70 (0.60, 0.82)                       | 0.78 (0.66, 0.91)          |
| Reynolds Risk Score      |          |                                         |                            |
| < 5%                     | 388      | 0.77 (0.63, 0.94)                       | 0.82 (0.66, 1.00)          |
| 5 - < 10%                | 130      | 0.70 (0.50, 1.00)                       | 0.66 (0.47, 0.95)          |
| 10 - < 20%               | 96       | 0.79 (0.52, 1.19)                       | 0.85 (0.56, 1.29)          |
| $\geq 20\%$              | 36       | 0.66 (0.33, 1.33)                       | 0.59 (0.28, 1.24)          |
| <i>P</i> for interaction |          | 0.92                                    | 0.92                       |
| <b>TOTAL CVD</b>         |          |                                         |                            |
| All women                | 1860     | 0.67 (0.61, 0.73)                       | 0.73 (0.66, 0.80)          |
| Reynolds Risk Score      |          |                                         |                            |
| < 5%                     | 1032     | 0.73 (0.65, 0.83)                       | 0.78 (0.69, 0.89)          |
| 5 - < 10%                | 422      | 0.83 (0.69, 1.01)                       | 0.82 (0.67, 0.99)          |
| 10 - < 20%               | 276      | 0.65 (0.51, 0.84)                       | 0.65 (0.50, 0.84)          |
| $\geq 20\%$              | 130      | 0.76 (0.53, 1.09)                       | 0.81 (0.55, 1.19)          |
| <i>P</i> for interaction |          | 0.64                                    | 0.66                       |

\*Adjusted for age; randomized treatment assignment; smoking status; consumption of alcohol, saturated fat, fiber, fruits, and vegetables; menopausal status; postmenopausal hormone use.

**Table S3. Hazard ratios (95% CI) of total CVD according to time spent walking per week.**

|                    | <b>No. of Person-Years<br/>(No. of Events)</b> | <b>Age- and Treatment-adjusted HR<br/>(95% CI)</b> | <b>Multivariable-adjusted* HR<br/>(95% CI)</b> |
|--------------------|------------------------------------------------|----------------------------------------------------|------------------------------------------------|
| Walking quartile   |                                                |                                                    |                                                |
| 0 minutes          | 63,481 (347)                                   | 1.00                                               | 1.00                                           |
| 1 - 59 minutes     | 130,575 (596)                                  | 0.69 (0.61, 0.79)                                  | 0.78 (0.68, 0.89)                              |
| 1 – 2.5 hours      | 106,953 (365)                                  | 0.57 (0.49, 0.65)                                  | 0.69 (0.59, 0.80)                              |
| ≥ 2.5 hours        | 182,183 (552)                                  | 0.50 (0.44, 0.57)                                  | 0.64 (0.56, 0.73)                              |
| <i>P</i> for trend |                                                | <.0001                                             | 0.0002                                         |

\*Adjusted for age; randomized treatment assignment; smoking status; consumption of alcohol, saturated fat, fiber, fruits, and vegetables; menopausal status; postmenopausal hormone use; parent history of MI < 60 years of age; Pooled Cohort risk; vigorous-intensity physical activity.

**Table S4. Hazard ratios (95% CI) of total CVD for Walking ( $\geq 1$  hour/week vs.  $< 1$  hour/week) within categories of Pooled Cohort risk or Reynolds Risk score.**

|                          | # events | Age- and treatment-adjusted<br>HR (95% CI) | Multivariable HR<br>(95% CI)* |
|--------------------------|----------|--------------------------------------------|-------------------------------|
| All women                | 1860     | 0.67 (0.61, 0.73)                          | 0.78 (0.71, 0.86)             |
| Pooled Cohort category   |          |                                            |                               |
| < 5%                     | 865      | 0.77 (0.67, 0.88)                          | 0.83 (0.73, 0.96)             |
| 5 - < 7.5%               | 296      | 0.66 (0.52, 0.83)                          | 0.65 (0.51, 0.82)             |
| 7.5 - < 10%              | 223      | 0.66 (0.50, 0.86)                          | 0.70 (0.53, 0.93)             |
| $\geq 10\%$              | 476      | 0.75 (0.63, 0.90)                          | 0.80 (0.66, 0.96)             |
| <i>P</i> for interaction |          | 0.23                                       | 0.22                          |
| Reynolds Risk Score      |          |                                            |                               |
| < 5%                     | 1032     | 0.76 (0.67, 0.86)                          | 0.82 (0.72, 0.93)             |
| 5 - < 10%                | 422      | 0.69 (0.57, 0.84)                          | 0.70 (0.58, 0.86)             |
| 10 - < 20%               | 276      | 0.73 (0.57, 0.93)                          | 0.74 (0.58, 0.96)             |
| $\geq 20\%$              | 130      | 0.93 (0.65, 1.32)                          | 1.06 (0.73, 1.54)             |
| <i>P</i> for interaction |          | 0.49                                       | 0.03                          |

\*Adjusted for age; randomized treatment assignment; smoking status; consumption of alcohol, saturated fat, fiber, fruits, and vegetables; menopausal status; postmenopausal hormone use; parent history of MI  $< 60$  years of age; vigorous-intensity physical activity

**Figure S1. Age- and treatment-adjusted hazard ratios (HR) for total CVD for the joint association between physical activity and Reynolds Risk Score.**

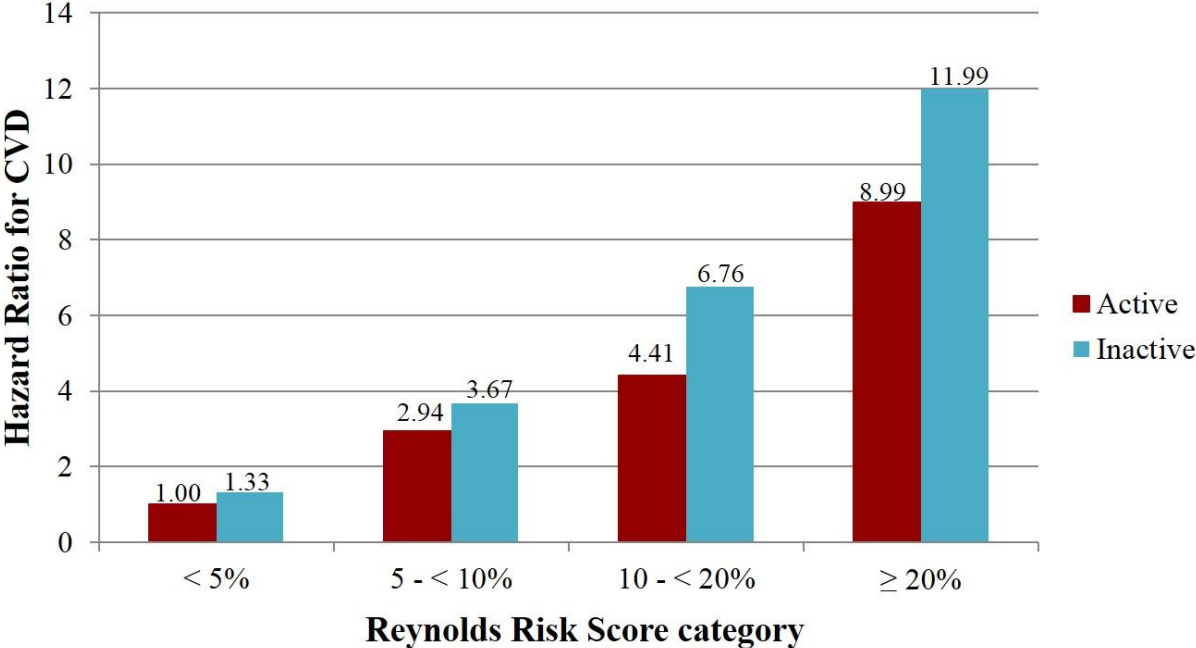

The models included age and randomized treatment assignment. All HR were significant at  $p = 0.01$ .  $P$  for interaction = 0.64.
